# Supplementary material
Source: MDPI journal article supplement (https://www.mdpi.com/2571-6255/7/2/41)
Supplement: s1 [file s1]

## Supplementary Materials

### Section A: Survey

#### A.1 Survey Consent Form

Age Assertion and Consent Form (In English)

This survey is part of a partnership between Ventura Regional Fire Safe Council and the University of California, Santa Barbara Bren School to understand how Ventura County residents prepare for, respond to, and recover from wildfires. Your participation in this survey will contribute to the development of a more inclusive Community Wildfire Protection Plan to make all Ventura County residents safer during a wildfire.

This work is also supported by Wonder Labs' Reimagining 2025: Living with Fire Design Challenge Program.

We ask that one adult member of your household (over the age of 18) complete this survey on behalf of all household members. Please respond to this survey by October 31st. Your participation in this survey is completely voluntary and there are no serious anticipated risks of participating.

Your responses will be confidential and anonymous. All questions are optional. The survey consists of 24 questions and could take between 10-20 minutes to complete. By completing the survey you consent to sharing your opinions, perspectives and some personal information with the research team. All responses will be securely stored on an internal computer server and will remain anonymous.

To thank you for your time and energy, at the end of the survey you may opt in to a raffle to win one of 5 \$25 Visa gift cards. Your contact information will not be connected to your responses.

If you have any questions or concerns about the survey after completing it, or would like to stay engaged in this project please email Kate Furlong: [email omitted] or call Ventura Regional Fire Safe Council: [phone omitted].

Electronic Consent: ☐ By clicking this box, you agree that you have read and understand the above form, volunteer to participate, and assert that you are 18 years or older.

#### A.2 Survey Questions

1. What zip code do you live in?
2. Which languages do you speak at home? (please check all that apply)
  - ☐ Arabic (1)
  - ☐ English (2)
  - ☐ Chinese (Mandarin, Cantonese) (3)
  - ☐ Korean (4)
  - ☐ Mixteco (5)
  - ☐ Spanish (6)
  - ☐ Tagalog (7)
  - ☐ Vietnamese (8)
  - ☐ Sign language (9)
  - ☐ Other(s) (10)
3. How do you identify?
  - ☐ Woman (1)
  - ☐ Man (2)
  - ☐ Transgender (3)
  - ☐ Non- binary (4)
  - ☐ Other (5)
  - ☐ Prefer not to answer (6)

- 
4. Please identify your race (check all that apply)
- ☐ American Indian or Alaskan Native (1)
  - ☐ Asian (2)
  - ☐ Black or African American (3)
  - ☐ Native Hawaiian or Other Pacific Islander (4)
  - ☐ White (5)
  - ☐ Some other race (please specify) (6)
  - ☐ Prefer not to answer (7)
5. What is your age?
- ☐ 18-24 (1)
  - ☐ 25-34 (2)
  - ☐ 35-44 (3)
  - ☐ 45-54 (4)
  - ☐ 55-64 (5)
  - ☐ 65-74 (6)
  - ☐ 75+ (7)
6. What is your household annual income? [Write-in]
7. When there is a wildfire in the area, how do you get information about it? Check all that apply.
- ☐ Neighbors (1)
  - ☐ Family/ friends in your area (2)
  - ☐ Family/ friends outside of your area (3)
  - ☐ Social media (Twitter, Facebook, Instagram, WhatsApp) (4)
  - ☐ Online neighborhood group (NextDoor, etc) (5)
  - ☐ Local news (TV, radio, website, app) (6)
  - ☐ Mobile phone emergency and weather alerts (7)
  - ☐ Public alerts/local law enforcement (8)
  - ☐ Other (please specify) (9)
  - ☐ None/ not applicable (10)
8. Does any person in your household have mobility or access needs (for example, a disability)?
- ☐ Yes (1)
  - ☐ No (2)
9. Do you have pets?
- ☐ Yes (1)
  - ☐ No (2)
10. How long have you lived in Ventura County?
- ☐ Less than one year (1)
  - ☐ 2-5 years (2)
  - ☐ 5-10 years (3)
  - ☐ More than 10 years (4)
11. Do you currently have homeowner or renters insurance for your home?
- ☐ Yes (1)
  - ☐ No (2)
12. In what way/s has your household been affected by wildfire? Check all that apply.
- ☐ I have evacuated from my home (1)
  - ☐ I have wanted to evacuate but couldn't (2)
  - ☐ I lost housing/my home (3)
  - ☐ I lost a loved one (4)
  - ☐ I lost pets/livestock (5)

- ☐ I lost income (6)
  - ☐ I experienced smoke and health impacts (7)
  - ☐ My general well-being (i.e. stress, fear) was affected (8)
  - ☐ Other (please specify) (9)
  - ☐ I have not been affected (10)
13. If you worry about wildfire, what concerns you most? Check all that apply.
- ☐ Home destruction/loss of personal items (1)
  - ☐ Personal injury or death (2)
  - ☐ Impact on family/loved ones (3)
  - ☐ Concerned about indoor pets (4)
  - ☐ Concerned about livestock and horses (5)
  - ☐ Poor air quality (6)
  - ☐ Disruptions to drinking water access (7)
  - ☐ Disruptions to electricity (8)
  - ☐ No place to go (9)
  - ☐ Missed days of work or school (10)
  - ☐ I don't worry about wildfire (11)
  - ☐ Other (please specify) (12)
14. What kinds of community-wide actions would make you feel safer from a wildfire? Check all that apply.
- ☐ Better home insurance (1)
  - ☐ Regular tree pruning and plant maintenance (2)
  - ☐ Regular gutter cleaning (3)
  - ☐ Home hardening: activities that make your home more resistant to fire embers (4)
  - ☐ Evacuation preparation (5)
  - ☐ Electrical infrastructure maintenance (6)
  - ☐ Community emergency planning (7)
  - ☐ Fire safety education (8)
  - ☐ I don't worry about wildfire (9)
  - ☐ Other (please specify) (10)
15. Do you currently feel prepared to evacuate your home in the event of a wildfire?
- ☐ Yes (1)
  - ☐ Somewhat (2)
  - ☐ No (3)
16. Is there anything that would make it difficult for your household to evacuate during a wildfire? Check all that apply:
- ☐ I don't have reliable transportation (1)
  - ☐ I have no alternative housing options with friends/family (2)
  - ☐ I am unable to afford alternative housing (hotel, motel, Airbnb, campsite, etc.) (3)
  - ☐ I don't know when to leave/lack of communication (4)
  - ☐ I don't have a way to transport my animals/don't want to leave my animals (5)
  - ☐ I want to stay and defend my home (6)
  - ☐ I am not ready to leave (7)
  - ☐ I have a disability that makes evacuation difficult (8)
  - ☐ Other (please specify) (9)
  - ☐ No, I could easily evacuate. (10)
17. Do you feel involved in efforts by the community to prepare for and prevent wildfire?
- ☐ Yes (1)
  - ☐ No (2)
  - ☐ I don't know (3)
  - ☐ Other (4)

18. Do you feel there are enough opportunities for you to participate in community-wide activities for wildfire preparedness and evacuation planning?
- ☐ Yes (1)
  - ☐ No (2)
  - ☐ Sometimes (3)
  - ☐ Not sure (4)
  - ☐ Other (please specify) (5)
19. Are you aware of the current Community Wildfire Protection Plan?
- ☐ Yes (1)
  - ☐ No (2)
  - ☐ I don't know (3)
20. Are you aware of your local Fire Safe Council?
- ☐ Yes (1)
  - ☐ No (2)
  - ☐ I don't know (3)
21. Would you be interested in providing input on a new Community Wildfire Protection Plan for Ventura County?
- ☐ Yes (1)
  - ☐ No (2)
  - ☐ I don't know (3)
  - ☐ I need more information (4)
22. If yes, what is the best way to include you in the community consultations and planning processes?
- ☐ Surveys (1)
  - ☐ Small group discussions (2)
  - ☐ Town halls (3)
  - ☐ Volunteer opportunities (4)
  - ☐ Participation in a planning committee (5)
  - ☐ Other (please specify) (6)
23. How would you like to stay updated on improvements to the Ventura Community Wildfire Protection Plan?
- ☐ Email (1)
  - ☐ Phone (2)
  - ☐ Text (3)
  - ☐ Mail (4)
  - ☐ None (5)
24. Would you like to share anything else about wildfire safety in your home or community? [Fill in]

#### *A.3 Survey Contact Form:*

This survey is the first step in the creation of an updated County wide Community Wildfire Protection Plan for Ventura County. This survey will help inform gaps on Wildfire and general disaster evacuation preparedness and also provide basis for further exploration of these topics in a focus group. Would you like to be contacted to participate in a discussion regarding these survey results?

Your contact information will not be connected to your previous responses.

- ☐ Yes, I would like to be contacted regarding a focus group to further share my view on this study and be entered to win a \$25 visa gift card (1)
- ☐ No, I would not like to be contacted regarding a focus group but I would like to be entered to win a \$25 Visa gift card (2)

- o I do not want to be contacted for either. Please do not enter me to win a gift card. (3)

#### Contact Information:

If you would not like to be contacted please enter nothing and submit.

- o Email (1)
- o Phone number (cell): (2)

Please select your preferred method of contact

- o Email (1)
- o Phone (2)

### Supplementary Materials

#### Section B: Focus Groups

##### *B.1 Facilitator's Guide (English)*

All facilitators and support should read this complete guide before the focus group.

Roles needed: Facilitator(s), Notetakers (2+): should be in the back, close enough to hear but out of sight so as not to be a distraction, Timekeeper: keeps track of time, communicates to facilitator how much time is left; manages audio recording; makes materials accessible to participants (see below).

Materials needed: Pens, Sign-in sheet: include a place for participants to opt-in to receive email updates, Hand sanitizer, Disinfectant wipes, Large post it sheets for writing notes/feedback, Nametags, Markers, Masks, Poster with agenda and Fire Safe Council's contact information, Gift cards, Agenda.

Welcome (15 min): All facilitators should introduce themselves (name, role/affiliation to the project, community of residence) and others who are present, including but not limited to the Ventura Regional Fire Safe Council and student research team.

Introduce the topic of wildfire: Wildfire is a natural phenomenon that has historically occurred in this region. Because of increased temperatures and worsening drought, wildfires are more intense and happen more frequently. They can threaten the health and safety of our community, so it is important to know how to plan for and respond to them. That is why we are here today.

Ventura Regional Fire Safe Council is working on an updated Community Wildfire Protection Plan, which will help our community plan for and respond to wildfires. We want this to be useful to everyone in the community. This is why we need your input. Your perspectives and opinions help us understand what the community needs and how the community can help. We really want to know what's currently working well in your communities, what's missing, and how Fire Safe can support future wildfire prevention, evacuation and response efforts. We will ask you questions about your life, opinions and experiences with wildfire, evacuation, and your opinions and ideas for wildfire planning.

The information you share today will help the Fire Safe Council and wildfire managers create an updated Community Wildfire Protection Plan that addresses our community's needs and assets. We thank you for being part of this important work to make our community safer during a wildfire.

We understand that wildfire affects people in this community in very real ways, and that this conversation may bring up difficult memories and emotions. There is space to share what comes up for you with the group, and you are welcome to take space by taking a break or leaving at any time. The group commits to respecting that everyone experiences and recovers from wildfire events differently.

Introduce Guidelines and answer participant questions (5 min)

Thank participants for showing up!

Tell participants that you are there to hear from them, that there are no right or wrong answers, and that your role is to simply guide discussions and make sure that everyone who wants to share has the opportunity to do so.

Ask again if participants are comfortable with the audio being recorded during the main portion of the focus group; audio will be stored securely, transcribed into notes, and eventually destroyed. If people have more questions/concerns, direct them to the research team. If someone is not comfortable with audio/video recording, do not record and ensure there are at least two people who can take notes throughout.

Introduce the conversation guidelines (below)

Ask if anyone has questions or concerns, answer any questions that arise; let them know that they can ask questions at any time.

#### Guidelines

Be safe: please keep your mask on at all times, except to drink water, and maintain a physical distance of 6 feet from others

Step up/step back: be aware of the space you're taking up in the discussion; if you tend to speak up a lot in discussions, challenge yourself to make space for others; if you tend to stay quiet during discussions, challenge yourself to share your thoughts

Be present: put away cell phones, other work and focus on the here/now

One person speaks at a time

Share the lessons, not the stories: After our discussion share ideas/concepts/major takeaways from the discussion, rather than sharing specifics/name

Speak from personal experience: everyone has diverse lived experience training and expertise; share from what you know and be willing to admit what you don't know

There are no right or wrong answers, so please share freely

Questions and discussion (1 hour): Tell participants you will transition into the main portion of the focus group conversation when we will be discussing what's working, what's needed, and how Fire Safe can support communities. Remind them that audio recording will now begin.

Begin by asking the first overarching question, what about wildfire preparation and response is working well in your neighborhood. Allow participants to answer, and ask follow-up questions as needed to keep the conversation moving. It's likely there won't be time for participants to discuss all of the questions. If there is not much conversation generated from a question, feel free to move on to the next one. Pay attention to who is speaking the most and whether someone looks as if they might have something to say. Consider asking quieter participants "Would you like to share?" or asking the group "What do other folks think?"

Aim to ask at least two questions from each section, and budget time accordingly.

If someone brings up a point that is worth deeper exploration or needs clarification, ask follow-up questions: "Could you say more?" or "How so?"

### Guiding Questions

The following are possible questions for discussion. Not all questions listed here will be relevant to each conversation. We will allow the conversation to evolve naturally, so questions not listed here are also likely to be a part of our conversation. The research team will listen to the conversation and observe participants as discussion goes on. They will pass on thoughts/suggestions to the facilitator to help guide discussion.

What's working well with wildfire prevention and response?

Who/what sources do you most trust to get information about local emergencies? Are you able to get the wildfire information you need?

During emergencies, who in your community do you reach out to?

Where do they get their information?

How do you communicate with them?

What wildfire planning projects have been most useful to your community in the past?

What's are gaps in wildfire prevention and response? / What's missing?

Do the wildfire preparations you and your community have made make you feel safe?

What is missing?

What would make your community feel safer or more prepared before, during, after a wildfire?

What is most challenging about wildfire? Why?

How has your community worked to recover after a wildfire, and what were the biggest challenges to recovering normalcy?

Who do you worry will have the hardest time responding to, coping with, and recovering from a wildfire event in your community? Why?

What does your community want or need to know about wildfire risk and prevention in your community?

What are the long-term impacts of a wildfire?

If you rent, are you comfortable asking your landlord to make home hardening improvements? Why or why not?

Is there anything we haven't asked you that you think is important to share/that you want to share?

What is needed to improve evacuation?

Do people in your community have safe, or refugee areas to stay in case of an evacuation?

What challenges are there?

How can Fire Safe support communities & fill in gaps (prevention, education, etc)?

How can Ventura County Fire Safe include your community in fire planning?

What are ways your neighbors and the community have supported each other during a wildfire, if at all?

How could Fire Safe and wildfire managers support those existing efforts? (what's needed?)

### *B.2 Facilitator's Guide (Spanish)*

Bienvenida (15 min): Todos los facilitadores deben presentarse (nombre, papel / afiliación al proyecto, comunidad de residencia) y a los representantes del Consejo Regional de Seguridad contra Incendios de Ventura (Ventura Regional Fire Safe Council or Fire Safe) y el equipo de investigación de Bren (los estudiantes).

Presente el tema de los incendios forestales: los incendios forestales son un fenómeno natural que históricamente ha ocurrido en esta región. Debido al aumento de las temperaturas y la sequía, los incendios forestales son más intensos y ocurren con mayor frecuencia. Pueden amenazar a la salud y la seguridad de nuestra comunidad, por lo que es importante saber cómo planificar y responder a ellos. Por eso estamos aquí hoy.

Ventura Fire Safe está creando un nuevo Plan Comunitario de Protección contra los Incendios Forestales, que ayudará a nuestra comunidad a planificar y responder a los incendios forestales. Queremos que esto sea útil para todos en la comunidad. Por eso necesitamos su opinión. Sus perspectivas y opiniones nos ayudan a comprender qué necesita la comunidad y cómo la comunidad puede ayudar. Realmente queremos saber qué funciona bien actualmente en sus comunidades, qué falta, y cómo Fire Safe puede apoyar a los esfuerzos futuros de prevención, evacuación y respuesta contra incendios forestales. Le haremos preguntas sobre su vida, opiniones y experiencias con incendios forestales, evacuación y sus opiniones e ideas para la planificación de incendios forestales.

La información que usted comparta hoy ayudará a Fire Safe y los gerentes de incendios forestales a escribir un nuevo Plan Comunitario de Protección contra Incendios Forestales actualizado que tenga en cuenta las necesidades y las ventajas de nuestra comunidad. Le agradecemos por ser parte de este trabajo importante para hacer que nuestra comunidad sea más segura durante un incendio forestal.

Entendemos que los incendios forestales afectan a sus vidas personales y que esta conversación puede traer recuerdos y emociones difíciles. Se pueden compartir lo que les surja con el grupo, o pueden tomar un descanso o irse en cualquier momento. El grupo se compromete a respetar que todos experimenten y se recuperen de los incendios forestales de manera diferente.

Presente las normas/acuerdos del grupo y responda a las preguntas de los participantes (5 min)

¡Gracias a los participantes por venir!

Dígalos a los participantes que los facilitadores está allí para escucharlos, que no hay respuestas correctas o incorrectas y que su papel es simplemente guiar las discusiones y asegurarse de que todos los que quieran compartir tengan la oportunidad de hacerlo.

Pregunte nuevamente si los participantes se sienten cómodos con el audio y video que se graba durante la parte principal del grupo focal; el audio/video se almacenará de forma segura, se transcribirá en notas y, finalmente, se destruirá. Si las personas tienen más preguntas o inquietudes, pueden hablar con el equipo de investigación. Si alguien no se siente cómodo con la grabación de audio / video, no grabe y asegúrese de que haya al menos dos personas que puedan tomar notas en todo momento.

Presente las normas de la plática/charla (a continuación)



Pregunte si alguien tiene preguntas o inquietudes, responda a cualquier pregunta que surja; recuerdeles que pueden hacer preguntas en cualquier momento.

#### Normas/acuerdos del grupo

Cuidense: mantenga su mascarilla puesta todo el tiempo, excepto para beber agua, y mantenga una distancia física de 6 pies de los demás

Participar y escuchar: sea consciente del espacio que está ocupando en la charla; si tiendes a hablar mucho en las pláticas, intente a dejar que los demás participen; Si tiende a permanecer callado durante las discusiones, intente compartir sus pensamientos.

Sea presente: guarde los teléfonos celulares, otros trabajos y concéntrese en el aquí / ahora

Una persona habla a la vez

Comparta las lecciones, no las historias: después de nuestra plática, comparte ideas / conceptos / conclusiones principales de la discusión, en lugar de compartir detalles

Comparte su experiencia personal: todo el mundo tiene experiencias diversas; comparte lo que sabe y esté dispuesto a admitir lo que no sabe

No hay respuestas correctas o incorrectas, así que compártelas libremente.

Presentaciones grupales (5 min): Diga a los participantes que guiará a un breve rompehielos en parejas para hacer que todos se sienten más cómodos. Si el grupo tiene más de 15 personas, pida a los participantes que se agrupen en parejas o de tres en tres con alguien que aún no conozcan. Pídeles que compartan su nombre y lo que más les gusta de su comunidad o vecindario (que puede definirse por sí mismo). Abisales cuándo les queda un minuto más de la actividad.

Preguntas y discusión (1 hora): Dígales a los participantes que pasará a la parte principal del grupo focal cuando tratamos de qué está funcionando, qué se necesita, y cómo Fire Safe puede ayudar a las comunidades. Recuérdeles que ahora comenzará la grabación de audio/video.

Empiece por hacer la primera pregunta general, ¿qué funciona bien en su comunidad con respecto a la preparación y respuesta ante incendios forestales que funcionan bien en su vecindario? Permita que los participantes respondan y haga mas preguntas si es necesario para mantener la conversación. Es probable que no haya tiempo para que los participantes discutan todas las preguntas. Si no se genera mucha conversación a partir de una pregunta, no dude en pasar a la siguiente. Preste atención a quién habla más y si alguien parece tener algo que decir. Considere preguntar a los participantes más tranquilos "¿Le gustaría compartir?" o preguntar al grupo "¿Qué piensan los demás?"

Trate de hacer al menos dos preguntas de cada sección y ten en cuenta la hora.

Si alguien menciona una idea que merece una exploración más profunda o necesita una aclaración, haga preguntas: "¿Podría decir más?" o "¿Cómo es eso?"

#### Preguntas

Las siguientes son posibles preguntas. No todas las preguntas enumeradas aquí serán relevantes para cada conversación. Permitiremos que la conversación evolucione de forma natural, por lo que es probable que las preguntas que no figuran aquí también formen parte de nuestra conversación. El equipo de investigación escuchará la conversación y observará a los participantes a medida que avanza la discusión. Pasarán sus pensamientos / sugerencias al facilitador para ayudar a guiar la discusión.

¿Qué funciona bien con la prevención y respuesta a incendios forestales?

¿En quién / qué fuentes confía más para obtener información sobre emergencias locales?

¿Puede obtener la información sobre incendios forestales que necesita?

Durante las emergencias, ¿a quién en su comunidad se comunica?

¿De dónde obtienen su información estas personas?

¿Cómo se comunica usted con ellos?

¿Qué proyectos de planificación de incendios forestales han sido más útiles para su comunidad en el pasado?

¿Qué falta para la prevención y respuesta a los incendios forestales en su comunidad?

¿Las preparaciones y los proyectos para incendios forestales que usted y su comunidad les han hecho lo hacen sentir seguro?

¿Que falta?

¿Qué haría que su comunidad se sintiera más segura o más preparada antes, durante y después de un incendio forestal?

¿Cómo pueden las personas de su comunidad involucrarse en estos proyectos?

¿Qué es lo más se preocupa sobre los incendios forestales? ¿Por qué?

¿Que ha hecho su comunidad para recuperarse después de un incendio forestal y que es lo que costara mas para volver a la normalidad?

¿A quién se preocupa que le resulte más difícil responder, afrontar y recuperarse de un incendio forestal en su comunidad? ¿Por qué?

¿Qué quiere o necesita saber su comunidad sobre el riesgo y la prevención de incendios forestales en su comunidad?

¿Cuáles son los impactos a largo plazo de un incendio forestal?

Si alquila, ¿se siente cómodo pidiéndole al dueño que haga mejoras para el fortalecimiento del hogar? ¿Por qué si o por qué no?

¿Qué tipo de recursos para la preparación de incendios forestales están disponibles en español?

¿Que falta?

¿Ha afectado el idioma la forma en que obtiene la información sobre incendios forestales que necesita?

¿Hay algo que no le hayamos preguntado que crea que es importante compartir o que desea compartir?

¿Qué se necesita para mejorar la evacuación?

¿Cuáles son algunos de los retos para evacuar su vecindario, si los hay?

¿Cómo puede Fire Safe apoyar a las comunidades aportar lo que falta (prevención, educación, etc.)?

¿Cómo puede Ventura County Fire Safe involucrar a su comunidad en la planificación de incendios?

¿Cuáles son las formas en que sus vecinos y la comunidad se han apoyado mutuamente (unos a otros) durante un incendio forestal, si es que lo han hecho?

¿Cómo podrían los administradores de incendios forestales y Fire Safe apoyar esos esfuerzos existentes? (¿qué se necesita?)

Otro (si hay tiempo)

¿Han cambiado las formas en que las personas de su comunidad responden a los incendios forestales en los últimos diez años? ¿Cómo?

¿Cuántos amigos cercanos o familiares tienes cerca? ¿Podrían proporcionarle comida, refugio u otra ayuda durante un incendio forestal?

¿La pandemia de COVID-19 cambió la forma en que su comunidad respondió a los incendios forestales en 2020? 2021?

## Supplementary Materials

### Section C: Additional Analyses

**Table S1.** Evacuation Preparedness Model Not Including Income

| Term             | Estimate | Standard Error | P-value    |
|------------------|----------|----------------|------------|
| Gender           |          |                |            |
| Woman            | -1.50    | 0.29           | 0.00000027 |
| Other            | -3.89    | 0.90           | 0.000017   |
| Age              |          |                |            |
| 25-34            | 3.62     | 0.92           | 0.000084   |
| 35-44            | 3.29     | 0.91           | 0.00039    |
| 45-54            | 1.66     | 0.87           | 0.056      |
| 55-64            | 3.59     | 0.90           | 0.000062   |
| 65-74            | 2.56     | 0.90           | 0.00441    |
| 75+              | 2.51     | 0.91           | 0.0058     |
| Mobility Concern |          |                |            |
| Yes              | -0.27    | 0.32           | 0.39       |
| Language         |          |                |            |

|                              |        |        |           |
|------------------------------|--------|--------|-----------|
| English + Another Language   | 1.50   | 0.32   | 0.0000029 |
| Non-English Language         | 1.27   | 0.45   | 0.0050    |
| Lived in Ventura             |        |        |           |
| 2-5 years                    | 4.00   | 4.00   | 0.011     |
| 5-10 years                   | 3.61   | 3.61   | 0.023     |
| More than 10 years           | 5.73   | 5.73   | 0.00022   |
| Race                         |        |        |           |
| Person of color              | -1.14  | 0.36   | 0.0015    |
| Prefer not to answer         | 1.03   | 1.05   | 0.33      |
| Wildfire Impacts Index Score | -0.083 | -0.083 | -0.083    |
| Mean RPS per Zip Code        | 0.11   | 0.11   | 0.11      |
| Evacuation Preparation Index | 0.44   | 0.44   | 0.44      |
| No Somewhat                  |        |        |           |
| Somewhat Yes                 | 0.23   | 0.23   | 0.23      |

**Table S2.** Evacuation Preparedness Model Including Non-Imputed Income

| Term                         | Estimate | Standard Error | P-value     |
|------------------------------|----------|----------------|-------------|
| Gender                       |          |                |             |
| Woman                        | -1.30    | 0.36           | 0.00038     |
| Other                        | -1.68    | 2.04           | 0.41        |
| Age                          |          |                |             |
| 25-34                        | 2.77     | 1.05           | 0.0083      |
| 35-44                        | 1.66     | 1.01           | 0.10        |
| 45-54                        | 0.59     | 1.02           | 0.56        |
| 55-64                        | 3.58     | 1.01           | 0.00039     |
| 65-74                        | 0.26     | 1.02           | 0.80        |
| 75+                          | 1.20     | 1.01           | 0.24        |
| Mobility Concern             |          |                |             |
| Yes                          | -0.62    | 0.40           | 0.12        |
| Language                     |          |                |             |
| English + Another Language   | 1.12     | 0.42           | 0.0081      |
| Non-English Language         | -3.13    | 0.87           | 0.00033     |
| Lived in Ventura             |          |                |             |
| 2-5 years                    | 4.24     | 1.65           | 0.010       |
| 5-10 years                   | 4.90     | 1.63           | 0.0026      |
| More than 10 years           | 7.87     | 1.62           | 0.0000012   |
| Race                         |          |                |             |
| Person of color              | -1.38    | 0.52           | 0.0079      |
| Prefer not to answer         | -0.017   | 1.12           | 0.99        |
| Wildfire Impacts Index Score | -0.042   | 0.17           | 0.80        |
| Mean RPS per Zip Code        | -0.44    | 0.17           | 0.010       |
| Non-imputed Income: Low      | 1.06     | 0.53           | 0.045       |
| Evacuation Preparation Index |          |                |             |
| No Somewhat                  | 6.47     | 1.85           | 0.00047     |
| Somewhat Yes                 | 10.34    | 1.91           | 0.000000063 |

**Table S3.** Evacuation Preparedness Model Including Imputed Income

| Term                         | Estimate | Standard Error | P-value   |
|------------------------------|----------|----------------|-----------|
| Gender                       |          |                |           |
| Woman                        | -1.51    | 0.31           | 0.0000018 |
| Other                        | -4.21    | 0.95           | 0.000014  |
| Age                          |          |                |           |
| 25-34                        | 3.67     | 0.94           | 0.00012   |
| 35-44                        | 3.69     | 0.92           | 0.000079  |
| 45-54                        | 1.73     | 0.89           | 0.051     |
| 55-64                        | 3.76     | 0.91           | 0.000044  |
| 65-74                        | 2.60     | 0.92           | 0.0049    |
| 75+                          | 2.50     | 0.93           | 0.0072    |
| Mobility Concern             |          |                |           |
| Yes                          | -0.26    | 0.34           | 0.43      |
| Language                     |          |                |           |
| English + Another Language   | 1.45     | 0.33           | 0.000019  |
| Non-English Language         | 1.10     | 0.50           | 0.030     |
| Lived in Ventura             |          |                |           |
| 2-5 years                    | 3.92     | 1.61           | 0.015     |
| 5-10 years                   | 3.35     | 1.58           | 0.035     |
| More than 10 years           | 5.83     | 1.55           | 0.00020   |
| Race                         |          |                |           |
| Person of color              | -1.16    | 0.37           | 0.0017    |
| Prefer not to answer         | 1.10     | 1.07           | 0.31      |
| Wildfire Impacts Index Score | -0.13    | 0.11           | 0.26      |
| Mean RPS per Zip Code        | 0.21     | 0.13           | 0.11      |
| Imputed Income: Low          | 0.16     | 0.74           | 0.83      |
| Evacuation Preparation Index |          |                |           |
| No Somewhat                  | 5.41     | 1.77           | 0.0024    |
| Somewhat Yes                 | 8.53     | 1.80           | 0.0000031 |

**Table S4.** Barriers to Evacuation Index Model Not Including Income

| Term                                          | Estimate | Standard Error | P-value    |
|-----------------------------------------------|----------|----------------|------------|
| Gender                                        |          |                |            |
| Woman                                         | 0.53     | 0.28           | 0.059      |
| Other                                         | 1.42     | 0.72           | 0.049      |
| Age                                           |          |                |            |
| 25-34                                         | -0.51    | 1.08           | 0.64       |
| 35-44                                         | -0.34    | 1.09           | 0.74       |
| 45-54                                         | 1.57     | 1.08           | 0.15       |
| 55-64                                         | -0.12    | 1.11           | 0.91       |
| 65-74                                         | -0.89    | 1.12           | 0.42       |
| 75+                                           | -0.10    | 1.12           | 0.37       |
| Mobility Concern                              |          |                |            |
| Yes                                           | -1.07    | 0.31           | 0.00057    |
| Language                                      |          |                |            |
| English + Another Language                    | 0.51     | 0.40           | 0.21       |
| Non-English Language                          | -2.58    | 0.82           | 0.0016     |
| Lived in Ventura                              |          |                |            |
| 2-5 years                                     | -1.94    | 0.84           | 0.020      |
| 5-10 years                                    | -3.51    | 0.78           | 0.0000073  |
| More than 10 years                            | -0.04    | 0.37           | 0.91       |
| Race                                          |          |                |            |
| Person of color                               | 1.08     | 1.03           | 0.30       |
| Prefer not to answer                          | 0.41     | 0.12           | 0.00051    |
| Wildfire Impacts Index Score                  | -0.67    | 0.13           | 0.00000059 |
| Mean RPS per Zip Code                         | -1.07    | 0.31           | 0.00057    |
| Barriers to Evacuation Index<br>(few to many) |          |                |            |
| 0 1                                           | -2.43    | 1.30           | 0.062      |
| 1 2                                           | -0.19    | 1.29           | 0.89       |
| 2 3                                           | 0.51     | 1.29           | 0.69       |
| 3 4                                           | 2.03     | 1.29           | 0.11       |
| 4 5                                           | 3.53     | 1.34           | 0.0082     |

**Table S5.** Barriers to Evacuation Index Including Non-Imputed Income

| Term                                          | Estimate | Standard Error | P-value     |
|-----------------------------------------------|----------|----------------|-------------|
| Gender                                        |          |                |             |
| Woman                                         | 0.52     | 0.35           | 0.13        |
| Other                                         | 2.47     | 1.56           | 0.11        |
| Age                                           |          |                |             |
| 25-34                                         | -0.60    | 1.92           | 0.761       |
| 35-44                                         | -1.59    | 1.91           | 0.40        |
| 45-54                                         | 2.11     | 1.92           | 0.27        |
| 55-64                                         | -0.32    | 1.92           | 0.87        |
| 65-74                                         | -1.63    | 1.92           | 0.40        |
| 75+                                           | -1.60    | 1.93           | 0.41        |
| Mobility Concern                              |          |                |             |
| Yes                                           | 2.91     | 0.39           | 0           |
| Language                                      |          |                |             |
| English + Another Language                    | -2.06    | 0.42           | 0.00000071  |
| Non-English Language                          | -1.36    | 0.65           | 0.037       |
| Lived in Ventura                              |          |                |             |
| 2-5 years                                     | -5.05    | 1.00           | 0.00000039  |
| 5-10 years                                    | -3.02    | 0.89           | 0.00070     |
| More than 10 years                            | -4.81    | 0.85           | 0.000000017 |
| Race                                          |          |                |             |
| Person of color                               | 0.86     | 0.44           | 0.051       |
| Prefer not to answer                          | 1.05     | 1.90           | 0.58        |
| Wildfire Impacts Index Score                  | 0.64     | 0.15           | 0.000018    |
| Mean RPS per Zip Code                         | -0.77    | 0.17           | 0.0000093   |
| Non-imputed Income: Low                       | 1.90     | 0.63           | 0.0027      |
| Barriers to Evacuation Index<br>(few to many) |          |                |             |
| 0 1                                           | -3.49    | 2.06           | 0.090       |
| 1 2                                           | -1.25    | 2.05           | 0.54        |
| 2 3                                           | -0.253   | 2.04           | 0.90        |
| 3 4                                           | 1.26     | 2.03           | 0.53        |
| 4 5                                           | 3.76     | 2.14           | 0.079       |



**Table S6.** Barriers to Evacuation Index Model Including Imputed Income

| Term                                          | Estimate | Standard Error | P-value      |
|-----------------------------------------------|----------|----------------|--------------|
| Gender                                        |          |                |              |
| Woman                                         | 0.50     | 0.32           | 0.11         |
| Other                                         | 1.53     | 0.80           | 0.058        |
| Age                                           |          |                |              |
| 25-34                                         | -0.64    | 1.79           | 0.73         |
| 35-44                                         | -1.04    | 1.67           | 0.54         |
| 45-54                                         | 1.33     | 1.86           | 0.48         |
| 55-64                                         | -0.44    | 1.76           | 0.80         |
| 65-74                                         | -1.28    | 1.69           | 0.45         |
| 75+                                           | -0.94    | 1.79           | 0.61         |
| Mobility Concern                              |          |                |              |
| Yes                                           | 2.10     | 0.35           | 0.0000000059 |
| Language                                      |          |                |              |
| English + Another Language                    | -1.07    | 0.35           | 0.0024       |
| Non-English Language                          | 0.45     | 0.45           | 0.32         |
| Lived in Ventura                              |          |                |              |
| 2-5 years                                     | -3.14    | 0.89           | 0.00049      |
| 5-10 years                                    | -1.85    | 0.85           | 0.030        |
| More than 10 years                            | -3.77    | 0.80           | 0.0000040    |
| Race                                          |          |                |              |
| Person of color                               | 0.06     | 0.42           | 0.89         |
| Prefer not to answer                          | 0.95     | 1.40           | 0.50         |
| Wildfire Impacts Index Score                  | 0.44     | 0.12           | 0.00036      |
| Mean RPS per Zip Code                         | -0.68    | 0.17           | 0.00014      |
| Imputed Income: Low                           | 1.12     | 0.62           | 0.082        |
| Barriers to Evacuation Index<br>(few to many) |          |                |              |
| 0 1                                           | -2.81    | 1.73           | 0.11         |
| 1 2                                           | -0.57    | 1.72           | 0.74         |
| 2 3                                           | 0.15     | 1.72           | 0.93         |
| 3 4                                           | 1.81     | 1.73           | 0.30         |
| 4 5                                           | 3.32     | 1.74           | 0.062        |

**Table S7.** Worries About Wildfire Index Model Not Including Income

| Term                                                      | Estimate | Standard Error | P-value     |
|-----------------------------------------------------------|----------|----------------|-------------|
| Gender                                                    |          |                |             |
| Woman                                                     | 0.95     | 0.24           | 0.000095    |
| Other                                                     | 0.99     | 0.65           | 0.13        |
| Age                                                       |          |                |             |
| 25-34                                                     | 1.66     | 1.02           | 0.10        |
| 35-44                                                     | 1.91     | 1.00           | 0.056       |
| 45-54                                                     | 2.51     | 1.00           | 0.012       |
| 55-64                                                     | 2.28     | 0.99           | 0.022       |
| 65-74                                                     | 1.55     | 0.99           | 0.12        |
| 75+                                                       | 1.54     | 1.01           | 0.13        |
| Mobility Concern                                          |          |                |             |
| Yes                                                       | -0.28    | 0.27           | 0.30        |
| Language                                                  |          |                |             |
| English + Another Language                                | 0.44     | 0.27           | 0.11        |
| Non-English Language                                      | 0.14     | 0.41           | 0.74        |
| Lived in Ventura                                          |          |                |             |
| 2-5 years                                                 | -1.26    | 0.76           | 0.096       |
| 5-10 years                                                | -1.01    | 0.78           | 0.20        |
| More than 10 years                                        | -0.89    | 0.72           | 0.21        |
| Race                                                      |          |                |             |
| Person of color                                           | -0.11    | 0.34           | 0.75        |
| Prefer not to answer                                      | 4.28     | 1.22           | 0.00045     |
| Wildfire Impacts Index Score                              | 0.57     | 0.10           | 0.000000024 |
| Mean RPS per Zip Code                                     | -0.03    | 0.11           | 0.76        |
| Worries About Wildfire Index<br>(least to most concerned) |          |                |             |
| 1 2                                                       | -0.09    | 1.21           | 0.94        |
| 2 3                                                       | 0.88     | 1.22           | 0.47        |
| 3 4                                                       | 1.74     | 1.22           | 0.15        |
| 4 5                                                       | 2.36     | 1.22           | 0.053       |
| 5 6                                                       | 3.14     | 1.22           | 0.010       |
| 6 7                                                       | 4.00     | 1.22           | 0.0010      |
| 7 8                                                       | 4.83     | 1.23           | 0.000084    |
| 8 9                                                       | 6.19     | 1.25           | 0.00000080  |
| 9 10                                                      | 14.15    | 11.20          | 0.21        |

**Table S8.** Worries About Wildfire Index Including Non-Imputed Income

| Term                                                      | Estimate | Standard Error | P-value      |
|-----------------------------------------------------------|----------|----------------|--------------|
| Gender                                                    |          |                |              |
| Woman                                                     | 1.04     | 0.30           | 0.00059      |
| Other                                                     | 1.47     | 1.43           | 0.30         |
| Age                                                       |          |                |              |
| 25-34                                                     | 1.99     | 1.22           | 0.10         |
| 35-44                                                     | 1.84     | 1.22           | 0.13         |
| 45-54                                                     | 3.45     | 1.20           | 0.0041       |
| 55-64                                                     | 2.64     | 1.18           | 0.025        |
| 65-74                                                     | 2.04     | 1.19           | 0.086        |
| 75+                                                       | 2.03     | 1.20           | 0.089        |
| Mobility Concern                                          |          |                |              |
| Yes                                                       | -0.81    | 0.32           | 0.011        |
| Language                                                  |          |                |              |
| English + Another Language                                | 0.33     | 0.34           | 0.32         |
| Non-English Language                                      | -0.51    | 0.66           | 0.44         |
| Lived in Ventura                                          |          |                |              |
| 2-5 years                                                 | -2.42    | 0.89           | 0.0068       |
| 5-10 years                                                | -1.48    | 0.84           | 0.077        |
| More than 10 years                                        | -1.61    | 0.77           | 0.036        |
| Race                                                      |          |                |              |
| Person of color                                           | 0.06     | 0.46           | 0.90         |
| Prefer not to answer                                      | 6.60     | 1.43           | 0.0000038    |
| Wildfire Impacts Index Score                              | 0.84     | 0.15           | 0.0000000079 |
| Mean RPS per Zip Code                                     | -0.23    | 0.14           | 0.091        |
| Non-imputed Income: Low                                   | 0.87     | 0.40           | 0.030        |
| Worries About Wildfire Index<br>(least to most concerned) |          |                |              |
| 1 2                                                       | -0.08    | 1.37           | 0.95         |
| 2 3                                                       | 1.24     | 1.38           | 0.37         |
| 3 4                                                       | 2.21     | 1.39           | 0.11         |
| 4 5                                                       | 2.81     | 1.39           | 0.044        |
| 5 6                                                       | 3.65     | 1.39           | 0.0087       |
| 6 7                                                       | 4.78     | 1.39           | 0.00057      |
| 7 8                                                       | 6.08     | 1.40           | 0.000015     |
| 8 9                                                       | 8.70     | 1.55           | 0.000000020  |
| 9 10                                                      | 27.68    | 1.55           | 0            |

**Table S9.** Worries About Wildfire Index Model Including Imputed Income

| Term                         | Estimate | Standard Error | P-value     |
|------------------------------|----------|----------------|-------------|
| Gender                       |          |                |             |
| Woman                        | 1.02     | 0.28           | 0.00033     |
| Other                        | 1.29     | 0.70           | 0.065       |
| Age                          |          |                |             |
| 25-34                        | 0.21     | 1.76           | 0.90        |
| 35-44                        | 0.07     | 1.72           | 0.97        |
| 45-54                        | 1.14     | 1.73           | 0.52        |
| 55-64                        | 0.87     | 1.70           | 0.61        |
| 65-74                        | 0.15     | 1.68           | 0.93        |
| 75+                          | 0.24     | 1.69           | 0.89        |
| Mobility Concern             |          |                |             |
| Yes                          | -0.39    | 0.29           | 0.17        |
| Language                     |          |                |             |
| English + Another Language   | 0.38     | 0.31           | 0.22        |
| Non-English Language         | 0.09     | 0.45           | 0.85        |
| Lived in Ventura             |          |                |             |
| 2-5 years                    | -1.41    | 0.81           | 0.082       |
| 5-10 years                   | -1.01    | 0.79           | 0.20        |
| More than 10 years           | -1.07    | 0.73           | 0.14        |
| Race                         |          |                |             |
| Person of color              | 0.10     | 0.39           | 0.79        |
| Prefer not to answer         | 3.11     | 1.71           | 0.077       |
| Wildfire Impacts Index Score | 0.64     | 0.11           | 0.000000035 |
| Mean RPS per Zip Code        | -0.06    | 0.12           | 0.63        |
| Imputed Income: Low          | 0.49     | 0.56           | 0.39        |
| Worries About Wildfire Index |          |                |             |
| (least to most concerned)    |          |                |             |
| 1 2                          | -1.30    | 1.76           | 0.47        |
| 2 3                          | -0.44    | 1.78           | 0.81        |
| 3 4                          | 0.37     | 1.78           | 0.84        |
| 4 5                          | 0.99     | 1.79           | 0.58        |
| 5 6                          | 1.81     | 1.78           | 0.32        |
| 6 7                          | 2.68     | 1.79           | 0.14        |
| 7 8                          | 3.54     | 1.80           | 0.057       |
| 8 9                          | 4.93     | 1.83           | 0.011       |
| 9 10                         | 12.55    | 11.04          | 0.26        |
